# Supplementary material for: Dynamic Switch of Negative Feedback Regulation in Drosophila Akt–TOR Signaling
Source: PubMed Central journal article supplement (PMC2887466; doi:10.1371/journal.pgen.1000990), 2010-06-17
Supplement: pgen.1000990.s009.pdf [file pgen.1000990.s009.pdf]

| Gene Symbol | Gene name                          | Fbgn        | DRSC Amplicon | Ave. Z-Score | Screen             |
|-------------|------------------------------------|-------------|---------------|--------------|--------------------|
| Akt1        | Akt1                               | FBgn0010379 | DRSC14108     | -9.8         | Insulin Stimulated |
| ric1        | rapa.-insensitive companion of Tor | FBgn0031006 | DRSC20071     | -8.8         | Insulin Stimulated |
| sec13       | sec13                              | FBgn0024509 | DRSC14144     | -7.1         | Insulin Stimulated |
| InR         | Insulin-like receptor              | FBgn0013984 | DRSC16717     | -6.8         | Insulin Stimulated |
| flil        | flightless I                       | FBgn0000709 | DRSC20578     | -6.1         | Insulin Stimulated |
| AGO1        | Argonaute-1                        | FBgn0026611 | DRSC05912     | -5.9         | Insulin Stimulated |
| Sin1        | SAPK-interacting protein 1         | FBgn0033935 | DRSC05965     | -5.9         | Insulin Stimulated |
| Nup133      | CG6958                             | FBgn0039004 | DRSC16150     | -5.2         | Insulin Stimulated |
| wdb         | widerborst                         | FBgn0027492 | DRSC14163     | -5.0         | Insulin Stimulated |
| CG7039      | CG7039                             | FBgn0030088 | DRSC18417     | -4.7         | Insulin Stimulated |
| Pi3K21B     | Pi3K21B                            | FBgn0020622 | DRSC00771     | -4.5         | Insulin Stimulated |
| Tsc1        | Tsc1                               | FBgn0026317 | DRSC16890     | -4.4         | Insulin Stimulated |
| Cpr49Ah     | Cuticular protein 49Ah             | FBgn0033731 | DRSC07204     | -4.4         | Insulin Stimulated |
| CG3004      | CG3004                             | FBgn0030142 | DRSC18262     | -4.3         | Insulin Stimulated |
| CG33143     | CG33143                            | FBgn0053143 | DRSC04454     | -4.2         | Insulin Stimulated |
| CG10830     | CG10830                            | FBgn0038839 | DRSC14270     | -3.9         | Insulin Stimulated |
| CG32626     | CG32626                            | FBgn0052626 | DRSC19366     | -3.8         | Insulin Stimulated |
| Pink1       | PTEN-induced putative kinase 1     | FBgn0029891 | DRSC18361     | -3.8         | Insulin Stimulated |
| l(1)10Bb    | lethal (1) 10Bb                    | FBgn0001491 | DRSC20346     | -3.7         | Insulin Stimulated |
| CG3756      | CG3756                             | FBgn0031657 | DRSC02719     | -3.7         | Insulin Stimulated |
| gig         | gigas                              | FBgn0005198 | DRSC11351     | -3.5         | Insulin Stimulated |
| SNF4Agamma  | AMPK gamma subunit                 | FBgn0025803 | DRSC16847     | -3.4         | Insulin Stimulated |
| eIF-1A      | Eukaryotic initiation factor 1A    | FBgn0026250 | DRSC16937     | -3.4         | Insulin Stimulated |
| CG12267     | CG12267                            | FBgn0038057 | DRSC14490     | -3.4         | Insulin Stimulated |
| tinc        | tincar                             | FBgn0038554 | DRSC16309     | -3.3         | Insulin Stimulated |
| Hsc70-4     | Heat shock protein cognate 4       | FBgn0001219 | DRSC16711     | -3.2         | Insulin Stimulated |
| CG9294      | CG9294                             | FBgn0034666 | DRSC04537     | -3.2         | Insulin Stimulated |
| eIF-2alpha  | eIF-2alpha                         | FBgn0004925 | DRSC20327     | -3.2         | Insulin Stimulated |
| CG5569      | CG5569                             | FBgn0034919 | DRSC04514     | -3.2         | Insulin Stimulated |
| CG4168      | CG4168                             | FBgn0028888 | DRSC01447     | -3.1         | Insulin Stimulated |
| CG11722     | CG11722                            | FBgn0037777 | DRSC14358     | -3.1         | Insulin Stimulated |
| CG5062      | CG5062                             | FBgn0029747 | DRSC18385     | -3.1         | Insulin Stimulated |
| Tak1        | TGF-beta activated kinase 1        | FBgn0026323 | DRSC20390     | -3.1         | Insulin Stimulated |
| CG1115      | CG1115                             | FBgn0037299 | DRSC12165     | -3.0         | Insulin Stimulated |
| Dbp45A      | DEAD box protein 45A               | FBgn0010220 | DRSC07395     | -3.0         | Insulin Stimulated |
| Hsc70-2     | Heat shock protein cognate 2       | FBgn0001217 | DRSC16710     | -2.9         | Insulin Stimulated |
| sec23       | sec23                              | FBgn0037357 | DRSC12387     | -2.8         | Insulin Stimulated |
| drk         | downstream of receptor kinase      | FBgn0004638 | DRSC07606     | -2.8         | Insulin Stimulated |
| Rpd3        | Rpd3                               | FBgn0015805 | DRSC08696     | -2.8         | Insulin Stimulated |
| CG11977     | CG11977                            | FBgn0037650 | DRSC14454     | -2.8         | Insulin Stimulated |
| eff         | effete                             | FBgn0011217 | DRSC16940     | -2.8         | Insulin Stimulated |
| DnaJ-1      | DnaJ-like-1                        | FBgn0015657 | DRSC11145     | -2.8         | Insulin Stimulated |
| CG5147      | CG5147                             | FBgn0036775 | DRSC10485     | -2.8         | Insulin Stimulated |
| eIF-4a      | Eukaryotic initiation factor 4a    | FBgn0001942 | DRSC03526     | -2.8         | Insulin Stimulated |
| D19A        | D19A                               | FBgn0022935 | DRSC11133     | -2.7         | Insulin Stimulated |
| mts         | microtubule star                   | FBgn0004177 | DRSC03574     | -2.7         | Insulin Stimulated |
| CG11190     | CG11190                            | FBgn0030035 | DRSC17774     | -2.7         | Insulin Stimulated |
| CG32829     | CG32829                            | FBgn0052829 | DRSC00961     | -2.7         | Insulin Stimulated |
| Aats-arg    | Arginyl-tRNA synthetase            | FBgn0027093 | DRSC20138     | -2.7         | Insulin Stimulated |

| Gene Symbol | Gene name                          | Fbgn        | DRSC Amplicon | Ave. Z-Score | Screen             |
|-------------|------------------------------------|-------------|---------------|--------------|--------------------|
| SNF1A       | SNF1A/AMP-activated protein kinase | FBgn0023169 | DRSC18714     | -2.7         | Insulin Stimulated |
| garz        | gartenzwerg                        | FBgn0033714 | DRSC07193     | -2.7         | Insulin Stimulated |
| foxo        | forkhead box, sub-group O          | FBgn0038197 | DRSC15463     | -2.7         | Insulin Stimulated |
| Dhh1        | DEAD/DEAH RNA helicase 1           | FBgn0011802 | DRSC11144     | -2.7         | Insulin Stimulated |
| CG31205     | CG31205                            | FBgn0051205 | DRSC13438     | -2.6         | Insulin Stimulated |
| blot        | bloated tubules                    | FBgn0027660 | DRSC11328     | -2.6         | Insulin Stimulated |
| CG7294      | CG7294                             | FBgn0003209 | DRSC03599     | -2.6         | Insulin Stimulated |
| CG31510     | CG31510                            | FBgn0051510 | DRSC14182     | -2.6         | Insulin Stimulated |
| CG12996     | CG12996                            | FBgn0030835 | DRSC19516     | -2.6         | Insulin Stimulated |
| Tor         | Target of rapamycin                | FBgn0021796 | DRSC02811     | -2.6         | Insulin Stimulated |
| Srp72       | Srp72                              | FBgn0038810 | DRSC15800     | -2.6         | Insulin Stimulated |
| CG3701      | CG3701                             | FBgn0034732 | DRSC04409     | -2.5         | Insulin Stimulated |
| CG1358      | CG1358                             | FBgn0033196 | DRSC06405     | -2.5         | Insulin Stimulated |
| Lis-1       | Lissencephaly-1                    | FBgn0015754 | DRSC07459     | -2.5         | Insulin Stimulated |
| Notum       | Notum                              | FBgn0044028 | DRSC09959     | -2.5         | Insulin Stimulated |
| CG4415      | CG4415                             | FBgn0031296 | DRSC00654     | -2.5         | Insulin Stimulated |
| CG3332      | CG3332                             | FBgn0031514 | DRSC00594     | -2.4         | Insulin Stimulated |
| CG7546      | CG7546                             | FBgn0035793 | DRSC10871     | -2.4         | Insulin Stimulated |
| I(2)05070   | lethal (2) 05070                   | FBgn0010590 | DRSC07159     | -2.4         | Insulin Stimulated |
| CG32654     | CG32654                            | FBgn0052654 | DRSC19788     | -2.4         | Insulin Stimulated |
| zfh2        | Zn finger homeodomain 2            | FBgn0004607 | DRSC17178     | -2.4         | Insulin Stimulated |
| crn         | crooked neck                       | FBgn0000377 | DRSC18755     | -2.3         | Insulin Stimulated |
| CG12090     | CG12090                            | FBgn0035227 | DRSC08249     | -2.3         | Insulin Stimulated |
| sktl        | skittles                           | FBgn0016984 | DRSC04715     | -2.3         | Insulin Stimulated |
| RpS5b       | Ribosomal protein S5b              | FBgn0038277 | DRSC16173     | -2.2         | Insulin Stimulated |
| nuf         | nuclear fallout                    | FBgn0013718 | DRSC11379     | -2.2         | Insulin Stimulated |
| zetaCOP     | zetaCOP                            | FBgn0040512 | DRSC11412     | -2.2         | Insulin Stimulated |
| rdgB        | retinal degeneration B             | FBgn0003218 | DRSC05596     | -2.2         | Insulin Stimulated |
| CG13217     | CG13217                            | FBgn0033590 | DRSC06339     | -2.1         | Insulin Stimulated |
| CG11136     | CG11136                            | FBgn0034540 | DRSC06045     | 2.1          | Insulin Stimulated |
| CG9411      | CG9411                             | FBgn0030569 | DRSC20184     | 2.1          | Insulin Stimulated |
| CG31158     | CG31158                            | FBgn0051158 | DRSC16141     | 2.1          | Insulin Stimulated |
| Rheb        | Rheb                               | FBgn0041191 | DRSC12148     | 2.1          | Insulin Stimulated |
| B4          | B4                                 | FBgn0023407 | DRSC01868     | 2.1          | Insulin Stimulated |
| CG13588     | CG13588                            | FBgn0035038 | DRSC04224     | 2.2          | Insulin Stimulated |
| Ing3        | Ing3                               | FBgn0030945 | DRSC20002     | 2.2          | Insulin Stimulated |
| CG15105     | CG15105                            | FBgn0034412 | DRSC06532     | 2.2          | Insulin Stimulated |
| ham         | hamlet                             | FBgn0045852 | DRSC02070     | 2.3          | Insulin Stimulated |
| CG9850      | CG9850                             | FBgn0034903 | DRSC04089     | 2.3          | Insulin Stimulated |
| mip130      | Myb interacting protein 130        | FBgn0023509 | DRSC18575     | 2.3          | Insulin Stimulated |
| Rtnl1       | Rtnl1                              | FBgn0053113 | DRSC02684     | 2.3          | Insulin Stimulated |
| CG9486      | CG9486                             | FBgn0031791 | DRSC03227     | 2.3          | Insulin Stimulated |
| Pk61C       | Protein kinase 61C                 | FBgn0020386 | DRSC08682     | 2.5          | Insulin Stimulated |
| CG8776      | CG8776                             | FBgn0033764 | DRSC07262     | 2.5          | Insulin Stimulated |
| CG10301     | CG10301                            | FBgn0039106 | DRSC14226     | 2.6          | Insulin Stimulated |
| loco        | locomotion defects                 | FBgn0020278 | DRSC16989     | 2.6          | Insulin Stimulated |
| CG4068      | CG4068                             | FBgn0029738 | DRSC18342     | 2.6          | Insulin Stimulated |
| Unc-89      | Unc-89                             | FBgn0053519 | DRSC04430     | 2.6          | Insulin Stimulated |
| nrv1        | nervana 1                          | FBgn0015776 | DRSC03382     | 2.6          | Insulin Stimulated |

| Gene Symbol | Gene name                               | Fbgn        | DRSC Amplicon | Ave. Z-Score | Screen             |
|-------------|-----------------------------------------|-------------|---------------|--------------|--------------------|
| CG14609     | CG14609                                 | FBgn0037483 | DRSC12553     | 3.0          | Insulin Stimulated |
| CG17255     | CG17255                                 | FBgn0030205 | DRSC18123     | 3.5          | Insulin Stimulated |
| sas         | stranded at second                      | FBgn0002306 | DRSC12631     | 3.6          | Insulin Stimulated |
| CG34401     | CG34401                                 | FBgn0052542 | DRSC19614     | 3.7          | Insulin Stimulated |
| alt         | aluminum tubes                          | FBgn0038535 | DRSC15315     | 3.7          | Insulin Stimulated |
| omd         | oocyte maintenance defects              | FBgn0038168 | DRSC10347     | 3.0          | Not Stimulated     |
| CG18814     | CG18814                                 | FBgn0042137 | DRSC10347     | 3.0          | Not Stimulated     |
| CG9723      | CG9723                                  | FBgn0030768 | DRSC20206     | 3.0          | Not Stimulated     |
| CG14329     | CG14329                                 | FBgn0038525 | DRSC14808     | 3.1          | Not Stimulated     |
| CG17472     | CG17472                                 | FBgn0032868 | DRSC02622     | 3.1          | Not Stimulated     |
| CG32852     | CG32852                                 | FBgn0052852 | DRSC12861     | 3.1          | Not Stimulated     |
| CG4877      | CG4877                                  | FBgn0036624 | DRSC10454     | 3.1          | Not Stimulated     |
| Rheb        | Rheb                                    | FBgn0041191 | DRSC12148     | 3.2          | Not Stimulated     |
| CG32103     | CG32103                                 | FBgn0052103 | DRSC10415     | 3.2          | Not Stimulated     |
| Oseg6       | Oseg6                                   | FBgn0034452 | DRSC06066     | 3.2          | Not Stimulated     |
| Pole2       | Pole2                                   | FBgn0035644 | DRSC09737     | 3.2          | Not Stimulated     |
| Pde11       | Phosphodiesterase 11                    | FBgn0085370 | DRSC02028     | 3.2          | Not Stimulated     |
| Tapdelta    | Translocon-associated protein delta     | FBgn0021795 | DRSC05946     | 3.2          | Not Stimulated     |
| CG14482     | CG14482                                 | FBgn0034245 | DRSC06454     | 3.2          | Not Stimulated     |
| CG31272     | CG31272                                 | FBgn0051272 | DRSC16058     | 3.3          | Not Stimulated     |
| CG3893      | CG3893                                  | FBgn0036826 | DRSC10386     | 3.3          | Not Stimulated     |
| CG31525     | CG31525                                 | FBgn0051525 | DRSC12004     | 3.3          | Not Stimulated     |
| PH4alphaEFB | prolyl-4-hydroxylase-alpha EFB          | FBgn0039776 | DRSC14950     | 3.4          | Not Stimulated     |
| CG12377     | CG12377                                 | FBgn0037168 | DRSC11672     | 3.4          | Not Stimulated     |
| r-l         | rudimentary-like                        | FBgn0003257 | DRSC17042     | 3.4          | Not Stimulated     |
| CG10495     | CG10495                                 | FBgn0032750 | DRSC02066     | 3.5          | Not Stimulated     |
| tacc        | transforming acidic coiled-coil protein | FBgn0026620 | DRSC12019     | 3.5          | Not Stimulated     |
| ari-2       | ariadne 2                               | FBgn0025186 | DRSC04672     | 3.5          | Not Stimulated     |
| S6k         | RPS6-p70-protein kinase                 | FBgn0015806 | DRSC11276     | 3.6          | Not Stimulated     |
| CG5171      | CG5171                                  | FBgn0031907 | DRSC02823     | 3.6          | Not Stimulated     |
| CG13829     | CG13829                                 | FBgn0039059 | DRSC14679     | 3.6          | Not Stimulated     |
| Adar        | Adenosine deaminase acting on RNA       | FBgn0026086 | DRSC17725     | 4.1          | Not Stimulated     |
| CG17244     | CG17244                                 | FBgn0039031 | DRSC15206     | 4.1          | Not Stimulated     |
| CG33310     | CG33310                                 | FBgn0053310 | DRSC01897     | 4.4          | Not Stimulated     |
| CG4644      | CG4644                                  | FBgn0031300 | DRSC00660     | 4.6          | Not Stimulated     |
| wge         | winged eye                              | FBgn0051151 | DRSC15672     | 4.7          | Not Stimulated     |
| Pk61C       | Protein kinase 61C                      | FBgn0020386 | DRSC08682     | 4.8          | Not Stimulated     |
| raptor      | raptor                                  | FBgn0029840 | DRSC18359     | 7.5          | Not Stimulated     |
